# Supplementary material
Source: MDPI journal article supplement (https://www.mdpi.com/2221-3759/9/3/38)
Supplement: s1 [file s1]

| Gene           | Forward Primer                  | Reverse Primer                  |
|----------------|---------------------------------|---------------------------------|
| Oct4 (qPCR)    | GTG GAG GAA GCT GAC AAC AA      | ATT CTC CAG GTT GCC TCT CA      |
| Nanog          | CAA AGG CAA ACA ACC CAC TT      | TCT GCT GGA GGC TGA GGT AT      |
| PAX6 (qPCR)    | AGT GAA TCA GCT CGG TGG TGT CTT | TGC AGA ATT CGG GAA ATG TCG CAC |
| RX (qPCR)      | AGC GAA ACT GTC AGA GGA GGA ACA | TCA TGC AGC TGG TAC GTG GTG AAA |
| OTX2 (qPCR)    | AGA GCA GCC CTC ACT CGC CA      | AGT CGG CCC AAA TCG GGG GT      |
| VSX2 (qPCR)    | GGC GAC ACA GGA CAA TCT TTA     | TTC CGG CAG CTC CGT TTT C       |
| SOX1           | CAA TGC GGG GAG GAG AAG TC      | CTC TGG ACC AAA CTG TGG CG      |
| CRX (qPCR)     | TGA TGC ACC AGG CTG TGC CCT A   | TGG CAA ACA GTG CCT CCA GCT C   |
| HOXB4          | GCA AAG AGC CCG TCG TCT AC      | CGT GTC AGG TAG CGG TTG TA      |
| GAPDH (qPCR)   | TGCACCACCAACTGCTTAGC            | GGCATGGACTGTGGTCATGAG           |
| Recoverin      | CTC CTT CCA GAC GAT GAA AAC A   | GCC AGT GTC CCC TCA ATG AA      |
| ARR3 (qPCR)    | AGG AAA GCC CTG TGG GAT TGA CTT | AAC CAG CCG CAC ATA GTC TCT CTT |
| L-OPSIN (qPCR) | GCCTACTTTGCCAAAAGTGC            | GATGAGACCTCCGTTTTGGA            |
| M-OPSIN (qPCR) | CATCTTTGGTTGGAGCAGGTACT         | TCTCTGCCTTCTGGGTGGAT            |
| S-OPSIN (qPCR) | ATACCGCAGCGAGTCCTATAC           | GATCCTACCATCACAACCAC            |
| NRL (qPCR)     | AGT TTG AGG TAA AGC GGG AAC CCT | ACC ATG CCT GGT TCA CTGAAG GT   |
| RHO (qPCR)     | TTTGGAGGGCTTCTTTGCCA            | CCTCGGGGATGTACCTGGAC            |
