# Supplementary material
Source: MDPI journal article supplement (https://www.mdpi.com/2221-3759/9/3/38)
Supplement: s1 [file s1]

| <b>Antibodies</b>                                                                                                                                      | <b>detection</b>              | <b>type</b>           | <b>source</b>                      | <b>Cat number</b> | <b>Dilution</b> |
|--------------------------------------------------------------------------------------------------------------------------------------------------------|-------------------------------|-----------------------|------------------------------------|-------------------|-----------------|
| VSX2<br>(CHX10)                                                                                                                                        | NRPC, PR<br>precursors;<br>BC | Rabbit<br>polyclonal  | ThermoFisher                       | PA582092          | 1:200           |
| Calretinin<br>(CaR)                                                                                                                                    | RGC and AC                    | Rabbit<br>polyclonal  | Milipore                           | AB5054            | 1:500           |
| Calbindin<br>(Cal)                                                                                                                                     | Horizontal cells<br>(HC)      | Chicken<br>polyclonal | Synaptic<br>systems                | 214006            | 1:500           |
| CRX                                                                                                                                                    | Photoreceptors                | Mouse<br>monoclonal   | Abnova                             | H00001406-<br>M02 | 1:100           |
| Ki67                                                                                                                                                   | Proliferation<br>NRPC         | Mouse<br>monoclonal   | BD<br>Biosciences                  | 556003            | 1:500           |
| NRL                                                                                                                                                    | Early rod                     | Goat<br>polyclonal    | R&D                                | AF2945            | 1:300           |
| OC1-<br>ONECUT1                                                                                                                                        | HC progenitor                 | Sheep<br>polyclonal   | R&D                                | AF6277            | 1:300           |
| OTX2                                                                                                                                                   | PR progenitor                 | Goat<br>polyclonal    | R&D                                | AF1979            | 1:2000          |
| pKCa                                                                                                                                                   | Bipolar cells                 | Mouse<br>monoclonal   | Thermofisher                       | MA1-157           | 1:100           |
| Recoverin                                                                                                                                              | Photoreceptors                | Rabbit<br>polyclonal  | Chemicon                           | AB5585            | 1:2000          |
| SNCG                                                                                                                                                   | RGC                           | Mouse<br>monoclonal   | Abnova                             | H00006623-<br>M01 | 1:500           |
| RHO                                                                                                                                                    | Rods                          | Mouse<br>monoclonal   | Gift from<br>Muayyad Al-<br>Ubaidi | Clone1D4          | 1:100           |
| SV2                                                                                                                                                    | PR synapse<br>marker          | Mouse<br>monoclonal   | DSHB                               | AB2315387         | 1:50            |
| S-Opsin                                                                                                                                                | Blue opsin<br>(cones)         | rabbit                | Invitrogen                         | pA5-112636        | 1:100           |
| L-Opsin                                                                                                                                                | Red opsin<br>(cones)          | rabbit                | Invitrogen                         | PA5-98031         | 1:100           |
| M-Opsin                                                                                                                                                | Green opsin<br>(cones)        | rabbit                | Invitrogen                         |                   | 1:100           |
| Secondary antibodies: anti-mouse (AF546, AF488, AF647); anti-rabbit (AF488, AF546, AF647); anti-chicken (AF488); anti-sheep (AF546); anti-goat (AF546) |                               |                       |                                    |                   |                 |

Neural retinal progenitor cells, NRPC; Development studies hybridoma bank, DSHB
